# Supplementary material
Source: HighWire-hosted journal article supplement (http://erj.ersjournals.com/highwire/filestream/114194/field_highwire_adjunct_files/2/ERJ_Ciavaglia_Online_supplement.pdf)
Supplement: ERJ_Ciavaglia_Online_supplement.pdf [file ERJ_Ciavaglia_Online_supplement.pdf]

## ONLINE SUPPLEMENT

### **The influence of exercise modality on dyspnoea perception during cardiopulmonary exercise testing in obese patients with COPD**

Casey E. Ciavaglia, Jordan A. Guenette, Josuel Ora, Katherine A. Webb,  
J. Alberto Neder, Denis E. O'Donnell

#### **METHODS**

Pulmonary function testing included routine spirometry, body plethysmography, single-breath diffusing capacity ( $D_{LCO}$ ) and maximum voluntary ventilation (MVV) using automated testing equipment (Vs62j body plethysmograph with Vmax229d; SensorMedics, Yorba Linda, CA) and was performed according to recommended techniques [1-3]. Cardiopulmonary exercise tests were performed according to recommended guidelines [4] on an electronically-braked cycle ergometer (Ergometrics 800S; SensorMedics, Yorba Linda, CA) and a treadmill (Medtrack ST55; Quinton Instrument, Bothell, WA) using a SensorMedics Vmax229d Cardiopulmonary Exercise Testing System.

#### ***Linearized incremental treadmill protocol***

The rate of work (watts) done against gravity while walking up an incline depends on the subject's absolute body weight, the walking speed and the grade [5]. Norman Jones [5] identified the following formula to quantify work done on the treadmill:

$$WR(t) = m * g * v(t) * AI/100$$

where  $WR$  is the time course of work (watts) performed,  $m$  is the absolute body mass in kilograms,  $g$  is the acceleration due to gravity ( $9.81 \text{ m/s}^2$ ),  $v(t)$  is the time course of velocity in meters/sec, and  $AI$  is the angle of inclination (or grade). Similarly, Cooper and Storer [6]

estimate work performed on a treadmill as follows:  $\text{watts} = 0.1634 * \text{speed (m/min)} * (\% \text{ grade}/100) * \text{body mass (kg)}$ . This equation can then be rearranged to solve for % grade.

In this study, the external work performed during treadmill and cycle testing protocols was matched to allow accurate comparison of dyspnea and physiological measurements at standardized work rates (and times): a linearized protocol with 10 watt increments increasing every 2 minutes in a stepwise fashion was used. Treadmill belt speed was selected to meet the subject's functional abilities, limit biomechanical inefficiencies (with high treadmill belt speeds) [7] and create a linear rise over time. Similar to previous studies [8,9], treadmill belt speed was initiated at 0.8 miles per hour (mph) (0.36 m/s) during the first work rate (10 watts) and the subsequent linear rise in speed was kept constant for each subject (Figure 1). The belt speed increased progressively to 1.4 mph (0.63 m/s) at 40 watts and 2.2 mph (0.98 m/s) at 80 watts. Body weight varied between subjects; therefore, the inter-subject curvilinear rise in percent grade was different for each subject.

The following table is a sample calculation of a representative male subject weighing 102 kg.

| Weight: 102 kg |                  |                                                     |            |                              |
|----------------|------------------|-----------------------------------------------------|------------|------------------------------|
| Time, minutes  | Work rate, watts | Speed*Grade = Work rate/(weight*0.043827801), mph*% | Speed, mph | Grade = Speed*grade/Speed, % |
| 1              | 10               | 2.236918397                                         | 0.8        | 2.8                          |
| 2              | 10               | 2.236918397                                         | 0.8        | 2.8                          |
| 3              | 20               | 4.473836793                                         | 1          | 4.5                          |
| 4              | 20               | 4.473836793                                         | 1          | 4.5                          |
| 5              | 30               | 6.71075519                                          | 1.2        | 5.6                          |
| 6              | 30               | 6.71075519                                          | 1.2        | 5.6                          |
| 7              | 40               | 8.947673587                                         | 1.4        | 6.4                          |
| 8              | 40               | 8.947673587                                         | 1.4        | 6.4                          |
| 9              | 50               | 11.18459198                                         | 1.6        | 7.0                          |
| 10             | 50               | 11.18459198                                         | 1.6        | 7.0                          |
| 11             | 60               | 13.42151038                                         | 1.8        | 7.5                          |
| 12             | 60               | 13.42151038                                         | 1.8        | 7.5                          |

|    |    |             |     |     |
|----|----|-------------|-----|-----|
| 13 | 70 | 15.65842878 | 2   | 7.8 |
| 14 | 70 | 15.65842878 | 2   | 7.8 |
| 15 | 80 | 17.89534717 | 2.2 | 8.1 |
| 16 | 80 | 17.89534717 | 2.2 | 8.1 |

Conversion factor:  $0.1634 * 26.8224$  ( $26.8224 \text{ m/min} = 1 \text{ mph}$ ) = 0.043827801

## RESULTS

### *Subjects*

Subjects reported the following comorbidities: hypertension (n=5), diabetes mellitus (n=5), hypercholesterolemia (n=3), obstructive sleep apnea (n=3), arthritis (n=3), anxiety (n=4) and depression (n=2). Three subjects reported past myocardial infarction, although five had reported coronary intervention (coronary bypass graft: n=3; stents: n=2). The degree of obesity ranged from mild to severe (BMI 30-51 kg/m<sup>2</sup>) [10]: there were eight class I (30-34.9 kg/m<sup>2</sup>), seven class II (35-39.9 kg/m<sup>2</sup>) and three class III (>40 kg/m<sup>2</sup>) obese subjects.

### *Responses to cycle and treadmill exercise*

Selected exercise responses are shown relative to oxygen consumption ( $\dot{V}O_2$ ) during treadmill and cycle testing (Figure 2).

## REFERENCES

1. Wanger J, Clausen JL, Coates A, Pedersen OF, Brusasco V, Burgos F, Casaburi R, Crapo R, Enright P, van derGrinten CP, Gustafsson P, Hankinson J, Jensen R, Johnson D, Macintyre N, McKay R, Miller MR, Navajas D, Pellegrino R, Viegi G. Standardisation of the measurement of lung volumes. *Eur Respir J* 2005; 26: 511–522.
2. Miller MR, Hankinson J, Brusasco V, Burgos F, Casaburi R, Coates A, Crapo R, Enright P, van der Grinten CP, Gustafsson P, Jensen R, Johnson DC, MacIntyre N, McKay R, Navajas D, Pedersen OF, Pellegrino R, Viegi G, Wanger J. Standardisation of spirometry. *Eur Respir J* 2005; 26: 319–338.
3. MacIntyre N, Crapo RO, Viegi G, Johnson DC, van der Grinten CP, Brusasco V, Burgos F, Casaburi R, Coates A, Enright P, Gustafsson P, Hankinson J, Jensen R, McKay R, Miller MR, Navajas D, Pedersen OF, Pellegrino R, Wanger J. Standardisation of the single-breath determination of carbon monoxide uptake in the lung. *Eur Respir J* 2005; 26: 720–735.

4. American Thoracic Society/American College of Chest Physicians. ATS/ACCP Statement on cardiopulmonary exercise testing. *Am J Respir Crit Care Med* 2003; 167, 211–277.
5. Jones NL. Clinical Exercise Testing. 4th Edn. Philadelphia, Pennsylvania, WB Saunders Company, 1997; pp. 224.
6. Cooper CB, Storer TW. Exercise Testing and Interpretation: A Practical Approach. New York, Cambridge University, 2001; pp. 28.
7. Wasserman K, Hansen JE, Sue DY, Stinger WW, Sietsema K, Sun XG, Whipp BJ. Principles of Exercise Testing and Interpretation: Including Pathophysiology and Clinical Applications. Baltimore, Maryland, Lippincott, Williams & Wilkins, 2011; pp. 132-134.
8. Porszasz J, Casaburi R, Somfay A, Woodhouse LJ, Whipp BJ. A treadmill ramp protocol using simultaneous changes in speed and grade. *Med Sci Sports Exerc* 2003; 35: 1596–1603.
9. Hsia D, Casaburi R, Pradhan A, Torres E, Porszasz J. Physiological responses to linear treadmill and cycle ergometer exercise in COPD. *Eur Respir J* 2009; 34: 605–615.
10. Expert Panel on the Identification, Evaluation, and Treatment of Overweight in Adults. Clinical guidelines on the identification, evaluation, and treatment of overweight and obesity in adults: executive summary. *Am J Clin Nutr* 1998; 68: 899–917.

## FIGURE LEGENDS

**Figure 1.** (a) Schematic diagram of the stepwise incremental treadmill protocol. (b) A linear rise in treadmill speed (open diamonds) and a curvilinear rise in grade (open squares) was individualized for each subject to match the protocol used during cycle testing, i.e., 2-min increments of 10 watts. (c) Each subject achieved a matched rise in work rate during cycle (closed circles) and treadmill (open squares) exercise.

**Figure 2.** Selected exercise responses are shown relative to  $\dot{V}'O_2$  during treadmill (open squares) compared to cycle testing (closed circles). There was no difference between test modalities for: (a) heart rate, (b) arterial oxygen saturation measured by pulse oximetry ( $SpO_2$ ), (c) ventilatory equivalent for carbon dioxide ( $\dot{V}'_E/\dot{V}'CO_2$ ) (d) partial pressure of end-tidal  $CO_2$  ( $P_{ET}CO_2$ ), but significant differences (\* $p < 0.01$ ) in cycle versus treadmill at a standardized  $\dot{V}'O_2$  of 1 L/min for: (e) carbon dioxide output ( $\dot{V}'CO_2$ ) and (f) respiratory exchange ratio (RER). Data are shown as means  $\pm$  SEM.
